# 1 Diallel Analysis for Morphological and Biochemical Traits in Tomato Cultivated 2 Under the Influence of Tomato Leaf Curl Virus

3 Prashant Kaushik<sup>1</sup> and Major Singh Dhaliwal<sup>2</sup>

4 <sup>1</sup> Instituto de Conservación y Mejora de la Agrodiversidad Valenciana, Universitat  
5 Politècnica de València, Valencia 46022, Spain.

6 <sup>2</sup> Department of Vegetable Science, Punjab Agricultural University, Ludhiana 141004,  
7 India.

8 **Abstract:** Eloquent information about the genetic basis of inheritance is important for any  
9 breeding program. Therefore, a diallel study was conducted under the influence of tomato  
10 leaf curl virus (TLCV) disease, using the eleven advanced lines of tomato. Firstly, the  
11 information regarding percent disease index (PDI) was determined via artificial screening  
12 with viruliferous whiteflies. Later, these lines were crossed in half diallel mating design to  
13 produce fifty-five one-way hybrids. These hybrids and parental genotypes were  
14 evaluated for seven morphological and three biochemical traits under open field  
15 conditions. Using the Griffing approach (Method II and Model I) basis of inheritance of  
16 traits were determined. Also, a Bayesian model was applied to the total yield descriptor.  
17 Correlations data indicated that total yield was not correlated with any other trait. The  
18 significant general combining ability (GCA) and specific combining ability (SCA)  
19 values indicates exploitable genetic variation. The broad-sense heritability values were  
20 larger than narrow-sense heritability, showing that selection will be efficient for the  
21 improvement of these traits. Hybrid combinations H23, H42 and H49 can be  
22 considered efficient for the selection of multiple traits, including yield. Overall, this study  
23 provides a useful information regarding the genetics of important traits of tomato under  
24 TLCV infestation.

25 **Keywords:** Tomato; TLCV; Combining ability; Resistance breeding; Hybrid  
26 development; Diallel analysis; Griffing approach; Bayesian

27

---

## 28 1. Introduction

29 Tomato (*Solanum lycopersicum* L.) is among the most cultivated plants; hence, the  
30 efforts of its genetic improvement dates back to last century and are still enduring through  
31 traditional breeding and genomics-based approaches [1,2]. Tomatoes are well acclimatized  
32 and breed to yield under extreme climatic conditions like drought and frost [3–5]. But,  
33 insect pest and diseases are still big challenges for the successful production of tomatoes.  
34 Worldwide, approximately around 146 viruses belonging to 33 different genera are reported  
35 to infect tomato plant [6,7]. Among them, the genus *Begomovirus* causes huge economic  
36 losses to tomato production. Belonging to this genus a DNA virus known as the tomato leaf  
37 curl virus (TLCV) is a serious disease of tomato and its incidence, can easily result up to 90  
38 percent yield loss to the tomato crop [8,9].

39 Tomato production especially of autumn season crop in Northern India and summer  
40 season crop of Southern India is susceptible to the high incidence of tomato leaf curl virus  
41 (TLCV) disease [10]. TLCV is transmitted by whitefly (*Bemisia tabaci* Genn.) in a  
42 circulative and persistent manner [11]. Hitherto, in North India, tomato leaf curl New Delhi  
43 virus a strain of TLCV reported from New Delhi region of India has an extensive  
44 distribution and also infects several other vegetable crops e.g. Eggplant, Squash and

45 Pepper [12]. As a response to TLCV infection plant leaves shows symptoms like, curling  
46 of leaf margins, shrinking and thickening of leaf surface. While the overall plant become  
47 stunted in growth, with few and misshaped fruits[11]. Extensive efforts in the form of  
48 phenotypic screening has been taken in order to identify resistant genotypes . In this  
49 respect, the artificial cage inoculation using viruliferous whiteflies is the most competent  
50 and reliable method to carry out the screening for TLCV disease. Although with artificial  
51 screening, the plant gives a strong reaction response, than it might give under the field  
52 conditions[13,14].

53 Tomatoes are a important source of nutraceuticals like vitamins (C, K, B6 etc.),  
54 phenolic acids, and minerals (folate, manganese etc.). All of these are vital for human  
55 health and body development [15,16]. Particularly, its fruits contain one of the important  
56 dietary carotenoids known as lycopene, important for the prevention of chronic diseases  
57 like breast, lung and prostate cancer [17–19]. The lycopene content of tomato varies based  
58 on genotypes genetic makeup, cultivation environment, disease pressure, and genotype-by-  
59 environment interactions [20]. The nutraceutical properties of tomato fruit have  
60 industrialized the processing of tomatoes; commonly, tomatoes are processed as juice,  
61 ketchup, paste, and sauce [21]. These biochemical aspects of the tomato fruit have become  
62 an important goal of tomato breeding programs [22,23].

63 Hybrid development is a successful approach for vegetable improvement, especially  
64 for solanaceous vegetables. Also, to chalk out a breeding strategy for successful cultivation  
65 under TLCV infestation it is important to have information about the inheritance of traits  
66 under the prevailing conditions. Therefore, estimation general combining ability (GCA) and  
67 the specific combining ability (SCA) is important for genetic enhancement of the crop. But,  
68 the amount of variation in GCA and SCA values not totally rest on gene effects besides it  
69 also involves the gene structure of the parents involved [24]. Diallel mating design based  
70 on general linear model framed by Griffing [25] is a popular choice and widely accepted  
71 tool for identification of the hybrid combinations of interest in tomato and in other  
72 members of Solanaceae [26–28]. Previously studies indicated that leaf characteristics and  
73 foliar pubescence affect the feeding preferences of whiteflies [29,30]. Sometimes,  
74 Griffing`s method is not adequate in case of missing data, imbalance, and outliers under the  
75 situations where chances of bias are too high to avoid. This is especially true with  
76 experiments carried out under disease pressure conditions [31,32].

77 The use of more rigorous Bayesian methods are used to overcome these limitations  
78 [33,34]. The BayesDiallel approach uses a Markov chain Monte Carlo (MCMC) sampling  
79 distribution which intern provides a greater flexibility, which further improves the  
80 biological interpretability of results. Therefore, in this study, the parameter of the total yield  
81 (kg/plant) was investigated with this Bayesian approach. Bayesian approach is not popular  
82 among the plant breeding community because of calculation limitations and complexity of  
83 statistics involved [35]. But, the different models based on Bayesian approach provides a  
84 more vigorous and detailed analysis of highly variable and complex trait like yield. An  
85 acquaintance of the genetics of important morphological traits under tomato leaf curl virus  
86 infestation conditions will be helpful for carrying out efficient selection and breeding.

87 Therefore, the objectives of this study were to determine GCA, SCA, and heritability  
88 of tomato genotypes crossed in a half diallel mating design. Further, the BayesDiallel  
89 approach was used to provide a more comprehensive analysis of diallel data generated for  
90 the total yield. By applying BayesDiallel approach first time on the total yield data of the  
91 diallel cross under TLCV conditions along with Griffing`s method, we aim to precisely  
92 estimate the combining ability and the heritability estimates and to suggest a robust  
93 approach aimed at tomato TLCV resistance breeding.

## 94 **2. Materials and Methods**

95 *2.1. Plant Material and Artificial Screening*

96 Eleven advanced lines of tomato developed at the Punjab Agricultural University  
 97 (coordinates at 30°54'6.893" N 75°48'27.989" E), Ludhiana, India were artificially screened  
 98 for resistance to TLCV disease during 2011-12. The artificial screening of seedlings (~ 2-3  
 99 week old) was carried out by challenging 25 plants of each of the eleven genotype with  
 100 viruliferous whiteflies reared on the TLCV disease affected plant, the detailed method is  
 101 provided elsewhere [26]. The disease reaction of genotypes was scored on the scale, where  
 102 0–10% resistant (R), >10–30% moderately resistant (MR), >30-70% susceptible (S), and  
 103 >70-100% highly susceptible (HS) [36,37]. Further, the potential disease incidence (PDI)  
 104 was measured as the (number of infected plants/total number of plants) × 100. While, the  
 105 eleven genotypes were crossed in a diallel mating design during February-March of 2012  
 106 resulting in fifty-five one way F<sub>1</sub> hybrids. Thereafter, the first cross combination, H1 is  
 107 referred to as the first cross in the half diallel i.e. H1 (P1 × P2) and so on, until the last cross  
 108 as H55 (P10×P11) (Table 1). The 11 parental genotypes and 55 one-way hybrids were  
 109 evaluated under the whitefly infestation conditions during the August of 2012 in a  
 110 randomized complete block design. Each entry was replicated twice and each replication  
 111 accommodated 15 plants. Plant production practices were exercised as per the Package of  
 112 Practices (Anonymous) and no chemical treatment was used to control the whiteflies. Data  
 113 were recorded on 13 central plants leaving one plant on either side of the row.  
 114  
 115

**Table 1.** Representation of the hybrid cross combinations (55 in total) developed as a result of half-diallel mating design.

|            | <b>P1</b> | <b>P2</b> | <b>P3</b> | <b>P4</b> | <b>P5</b> | <b>P6</b> | <b>P7</b> | <b>P8</b> | <b>P9</b> | <b>P10</b> | <b>P11</b> |
|------------|-----------|-----------|-----------|-----------|-----------|-----------|-----------|-----------|-----------|------------|------------|
| <b>P1</b>  |           | H1        | H2        | H3        | H4        | H5        | H6        | H7        | H8        | H9         | H10        |
| <b>P2</b>  |           |           | H11       | H12       | H13       | H14       | H15       | H16       | H17       | H18        | H19        |
| <b>P3</b>  |           |           |           | H20       | H21       | H22       | H23       | H24       | H25       | H26        | H27        |
| <b>P4</b>  |           |           |           |           | H28       | H29       | H30       | H31       | H32       | H33        | H34        |
| <b>P5</b>  |           |           |           |           |           | H35       | H36       | H37       | H38       | H39        | H40        |
| <b>P6</b>  |           |           |           |           |           |           | H41       | H42       | H43       | H44        | H45        |
| <b>P7</b>  |           |           |           |           |           |           |           | H46       | H47       | H48        | H49        |
| <b>P8</b>  |           |           |           |           |           |           |           |           | H50       | H51        | H52        |
| <b>P9</b>  |           |           |           |           |           |           |           |           |           | H53        | H54        |
| <b>P10</b> |           |           |           |           |           |           |           |           |           |            | H55        |
| <b>P11</b> |           |           |           |           |           |           |           |           |           |            |            |

116

117 *2.2. Morphological and Biochemical Data Analysis*

118 Data for seven morphological and three biochemical traits were recorded and  
 119 inferences were made. Total yield (kg plant<sup>-1</sup>) and marketable yield (kg plant<sup>-1</sup>) were  
 120 determined on per plant basis i.e. by dividing the harvest of all picking with the number of  
 121 plants. Fruit weight (g) was estimated as an average weight per fruit of the ten fruits sample  
 122 collected at the red ripe stage. Five fruits per replication were used to measure the  
 123 equatorial diameter, polar diameter and pericarp thickness. The polar diameter of cut fruits  
 124 was measured as the distance between the stalk end and the blossom end. Conversely, the  
 125 equatorial diameter was measured as the transversal distance of the fruit. Pericarp thickness  
 126 was measured from centre of the fruit. These fruit-based morphometric measurements were  
 127 recorded with the help of the Vernier caliper.

128 Three biochemical parameters estimated included dry matter, lycopene and total  
129 soluble solids (TSS) using three samples for each replication. Each sample was constituted  
130 of five red ripe fruits. Dry matter percentage was measured as the change of weight before  
131 and after oven drying at 70°C and was calculated based on the formula  $100 \times (\text{dry}$   
132  $\text{weight} / \text{fresh weight})$ . TSS content of fruits was determined with the help of a hand  
133 refractometer (RA-130- KEM, Kyoto Electronics Manufacturing Co., Ltd., Kyoto, Japan).  
134 The readings were recorded as °Brix (0 to 32) at room temperature. Lycopene content was  
135 determined by the method suggested elsewhere [38]. The optical densities of processed  
136 extracts for the lycopene content were recorded at 505 nanometers (nm) using Spectronic  
137 20 (Thermo Fisher Scientific, Waltham, Massachusetts, USA). The combining abilities  
138 were estimated based on the Griffing's Method 2 (parental genotypes and one-way hybrids)  
139 with Model 1 (fixed effect).[25] The diallel calculations were performed with the help of  
140 package AGD-R (analysis of genetic designs with the R software package) version 4.0 [39].  
141 Pearson coefficients of correlation (r) and their P-values were calculated and plotted using  
142 the packages corrplot[40]. The chart.Correlation() function within the  
143 PerformanceAnalytics package was used to generate scatter plots and histograms along  
144 with detailed information regarding correlations[41].

### 145 2.3. Bayesian Model-Based Analysis of Total Yield

146 The R package BayesDiallel was used for the Bayesian model-based analysis of total  
147 yield data [34]. Briefly we used the “Bab” model in the BayesDillel package, this model  
148 includes an overall effect of being inbred (B), an additive component (a), and a measure of  
149 parent-specific inbred deviation (b). Also, the “Bab” model was applied using an MCMC  
150 Gibbs sampler with five chains, 10,000 iterations, and burn-in of 1000 [35].

## 151 3. Results and Discussion

### 152 3.1. Artificial Screening

153 Artificial screening with viruliferous whiteflies provided a dissimilar percent of disease  
154 incidence (PDI) values for each genotype (Figure 1). The minimum PDI% was recorded in  
155 P4 (29.2%, MR), whereas the maximum was recorded with the P1 (100%, HS) (Figure 1).  
156 All the eleven parental genotypes exhibited the TLCV symptoms after 60 days of artificial  
157 inoculation with viruliferous whiteflies. On the TLCV disease scale, two lines showed the  
158 mild resistance (MR), in contrast, three were highly susceptible (HS), while the rest were  
159 susceptible (Figure 1).

160 Earlier studies have shown that as compared to a natural field environment screening of  
161 genotypes for TLCV, artificial screening is more useful as it ensures a uniform disease  
162 infection, and leave few chances for a susceptible plant to escape infection due to non-  
163 preference and loss of whiteflies infectivity. But, 100% disease incidence is also common  
164 with artificial inoculation method [13,42]. Artificial screening method using whiteflies is  
165 commonly applied to find out the reaction of tomato lines to TLCV disease [43–45].  
166 Previously, the cultivated accessions and the landraces of tomato exhibited a varying range  
167 of the disease symptoms but lacked the complete resistance [46]. However, wild relatives of  
168 tomato e.g. *S. chmielewskii*, *S. habrochaites* and *S. pimpinellifolium* were found resistant  
169 even with artificial screening [14]. The differences in the results of field-based screening  
170 method could also be due to the difference in virus strain, vector genotype or altered  
171 feeding conditions [47, 48]

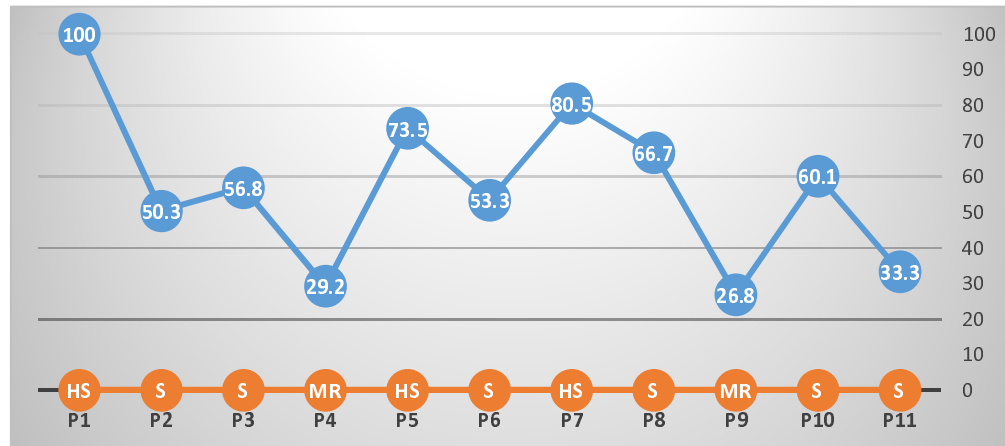

172

173 **Figure 1.**The percent disease incidence (PDI) reaction of parents to TLCV along  
174 with the grading scale (x-axis), where, HS (Highly Susceptible), MR (Moderately  
175 Resistant), and S (Susceptible).

### 176 3.2. Variation in Parents and Hybrids

177 The magnitude of the mean squares of genotypes indicated that there were significant  
178 differences among the genotypes for all morphological characters studied pointing out the  
179 presence of genetic variability (Table 2). Similarly, significant GCA and SCA effects for all  
180 measured traits were detected ( $P \leq 0.01$ ). The lowest values of GCA/SCA ratio was noted  
181 for polar diameter and TSS content (around 0.05) while the highest was recorded for the  
182 fruit weight (0.34). The remaining seven traits ranged from 0.10 to 0.16 (Table 2). This  
183 indicated that the non-additive gene effects were more prevalent for the characters under  
184 investigation. In general, the GCA variance was higher than that of SCA variance for the  
185 characters studied. The broad-sense heritability values were higher (above 0.9) than the  
186 narrow-sense heritability (Table 2), showing that selection between hybrids and varieties  
187 will be efficient for the improvement of these traits.

188 A higher magnitude of additive gene effects is useful for the development of pure-lines  
189 and to proceed with selection based breeding approaches. Non-additive gene effects are  
190 used for the development of hybrids. In previous studies presence of both additive and non-  
191 additive gene action was reported for most of the characters studied in a tomato. For  
192 example, additive gene action was reported to control yield and its component traits in  
193 tomato [49,50]. In contrast, nonadditive gene action was reported to control many traits in  
194 tomato [51,52]. Similarly, the additive and non-additive inheritance of biochemical traits  
195 like dry matter, lycopene, and TSS was also reported [53,54].

196

197

198

199

200

201

202 **Table 2.** Analysis of variance for GCA and SCA for the ten descriptors in tomato  
 203 under leaf curl virus conditions including GCA/SCA ratio, and narrow sense ( $h^2$ ) and  
 204 broad sense heritabilities ( $H^2$ ).

| Source of Variation | Genotypes <sup>a</sup> | GCA <sup>a</sup>       | SCA <sup>a</sup>      | Error | GCA/SCA ratio | $h^2$ | $H^2$ |
|---------------------|------------------------|------------------------|-----------------------|-------|---------------|-------|-------|
| DF                  | 65                     | 10                     | 55                    | 65    |               |       |       |
| Dry matter          | 0.38 <sup>***</sup>    | 0.66 <sup>***</sup>    | 0.33 <sup>***</sup>   | 0.11  | 0.16          | 0.22  | 0.95  |
| Equatorial diameter | 0.68 <sup>***</sup>    | 0.87 <sup>***</sup>    | 0.65 <sup>***</sup>   | 0.01  | 0.10          | 0.17  | 0.97  |
| Fruit weight        | 964.97 <sup>***</sup>  | 2755.90 <sup>***</sup> | 639.35 <sup>***</sup> | 31.90 | 0.34          | 0.38  | 0.94  |
| Locules             | 0.87 <sup>***</sup>    | 1.48 <sup>***</sup>    | 0.76 <sup>***</sup>   | 0.02  | 0.15          | 0.22  | 0.96  |
| Lycopene            | 1.58 <sup>***</sup>    | 1.91 <sup>***</sup>    | 1.51 <sup>***</sup>   | 0.01  | 0.10          | 0.16  | 0.95  |
| Marketable yield    | 0.55 <sup>***</sup>    | 0.71 <sup>***</sup>    | 0.52 <sup>***</sup>   | 0.01  | 0.10          | 0.17  | 0.96  |
| Pericarp thickness  | 0.03 <sup>***</sup>    | 0.05 <sup>***</sup>    | 0.03 <sup>***</sup>   | 0.07  | 0.13          | 0.20  | 0.95  |
| Polar diameter      | 0.83 <sup>***</sup>    | 0.55 <sup>***</sup>    | 0.88 <sup>***</sup>   | 0.01  | 0.05          | 0.10  | 0.97  |
| Total yield         | 0.56 <sup>***</sup>    | 0.91 <sup>***</sup>    | 0.50 <sup>***</sup>   | 0.01  | 0.15          | 0.22  | 0.96  |
| TSS                 | 0.35 <sup>***</sup>    | 0.28 <sup>***</sup>    | 0.36 <sup>***</sup>   | 0.01  | 0.06          | 0.10  | 0.94  |

205 <sup>a\*\*\*</sup>, <sup>\*\*</sup>, <sup>\*</sup> indicate significant at  $p < 0.001$ ,  $p < 0.01$ , or  $p < 0.05$ , respectively.

### 206 3.3. Bayesian Model-Based Estimates and Predictions of Total Yield

207 Both GCA and SCA contributed for the total yield showing that both additive and  
 208 nonadditive effects were significant. However, GCA values for the total yield was higher  
 209 than the SCA values (Table 2). The predicted means further revealed this with the  
 210 BayesDiallel Bab model (Figure 2.).

211 The fixed and individual strain additive effects were more stable and less despressed,  
 212 than the parent of origin and inbreeding effect (Figure 3). Justifying a large amount of GCA  
 213 component identified. The parental genotypes P1, P5 and P9 showed a negative parent of  
 214 origin and inbreeding effects (Figure 3). The observed vs expected values were found  
 215 different for some hybrid combinations (Figure 2). It could be attributed to the fact that  
 216 whiteflies have a preference for some genotypes. The virulence affected the degree and  
 217 plant reaction to the disease contributed to such effects [55,56].

218 Likewise, under TLCV disease pressure Bayesian approach helped in the  
 219 determination of heritable and non-heritable components influencing the total yield. This  
 220 precise determination can be used to determine the most appropriate breeding strategy for  
 221 maximising the genetic gain. Overall, this variance projection approach (VarP) is more  
 222 precise in providing the information about inheritance classes those will affect the future  
 223 experiments if these eleven parental genotypes are used again in the future [57]. The total  
 224 yield included the additive effect (VarP[a]=0.24) while, the effect of non-additive variance  
 225 was in the form of inbred penalty (VarP[B]=0.07), and the noise was 58.97 for the total

226 yield (Figure 4). Previously, in case of cross-pollinated carrots, it was found that the  
227 influence of nonadditive variation was largely due to the overall inbred penalty (non-  
228 additive effects), which contributed significantly to canopy height, shoot biomass, and root  
229 biomass [35].

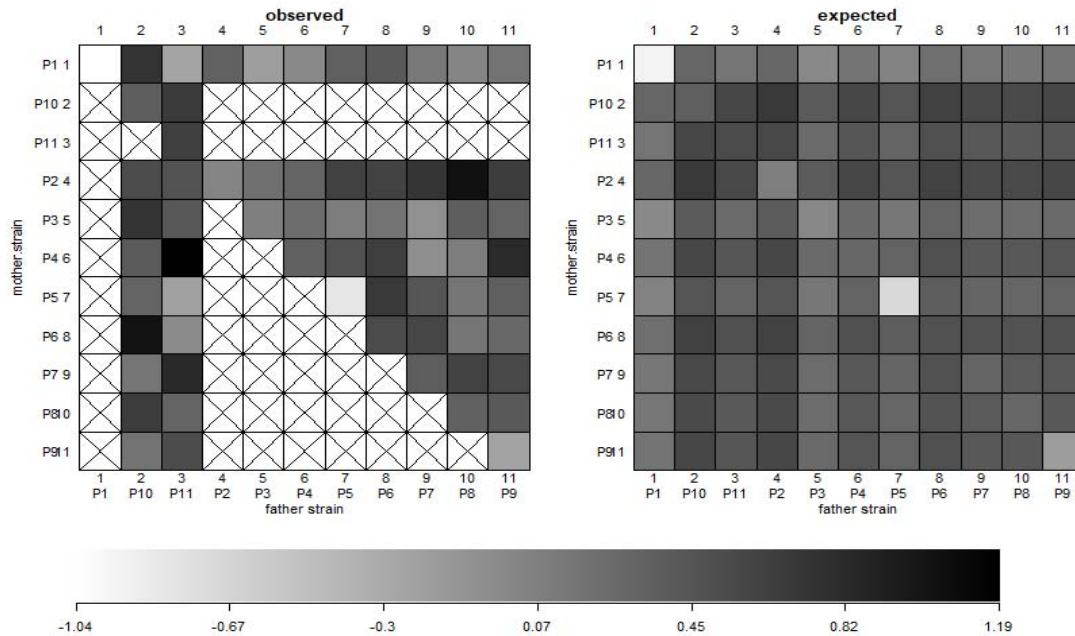

230

231 **Figure 2.** Total yield data of 55 hybrids and 11 parental genotypes in a half diallel.  
232 On the left, of parental (P1 to P11), with crossed boxes indicating the missing data  
233 (as half diallel was used) and the shaded box representing the values based on the  
234 horizontal scale (below). The right side graph shows predictive means based on the  
235 Bab diallel model on the scale of (-1.04 to 1.19).

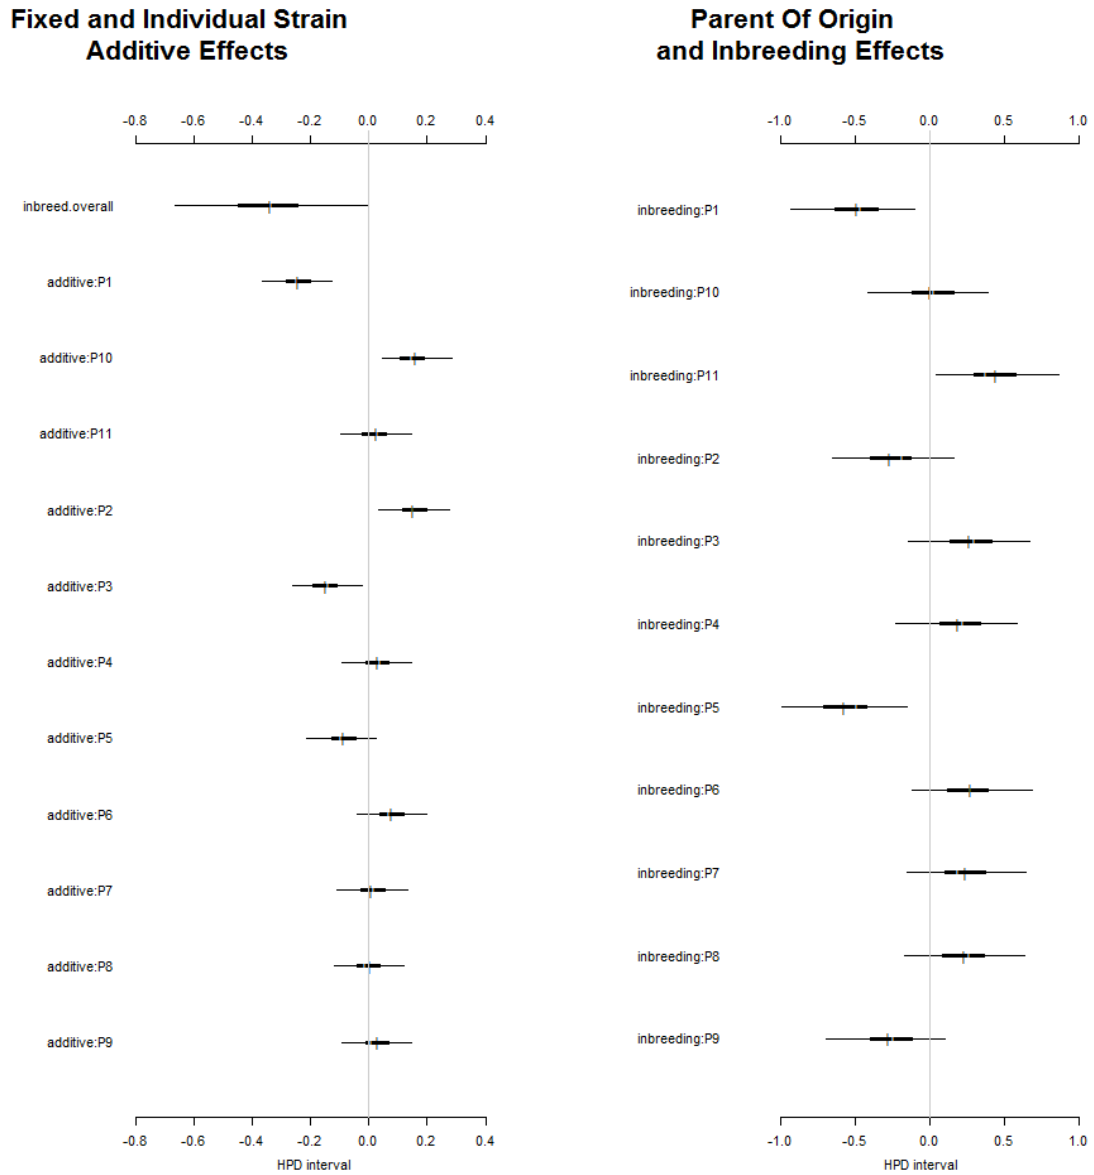

**Figure 3.** Highest posterior density (HPD) intervals of parent-specific additive effects, parent of origin and inbreeding effect of the 11 parents studied.

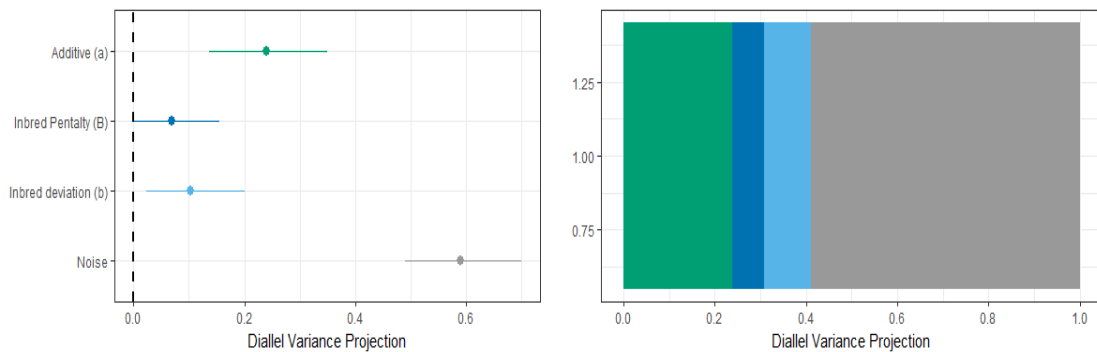

**Figure 4.** Diallel variance projections the genetic architecture for total yield.



241 3.4. *GCA and SCA estimates*

242 Estimates of general combining ability are presented in Table 4. The estimates were  
243 highly significant for all the characters studied for dry matter content. P2 expressed the  
244 highest GCA effect (0.346. For equatorial diameter, P4 was the best general combiner with  
245 the estimates of 0.273. Regarding fruit weight P5 (9.596) was the best general combiner  
246 followed by P8 (8.453) and P7 (7.770) (Table 4). The genotype with the highest CGA  
247 effects for the number of locules is P2 (0.355) followed by P8 (0.350) and P4 (0.261). The  
248 genotypes with above average GCA effects for lycopene content included P3 (0.454), P6  
249 (0.427) and P9 (0.213) (Table 4). The highest GCA effects for marketable yield of 0.188  
250 were recorded in genotypes P2, followed by P11 and P10. For pericarp thickness P8 (0.115)  
251 has the highest GCA effects. For polar diameter, highest GCA effects were observed in P7  
252 (0.263). While for total yield P10 (0.215), P11 (0.164) and P6 (0.154) high GCA effects.  
253 Likewise, the GCA effects of 0.195 and 0.152 were recorded for TSS content in the parents  
254 P8 and P1, respectively.

255

256 **Table 4.** The estimates of general combining ability (GCA) for the parent genotypes (11) for the ten descriptors studied under the  
 257 influence of leaf curl virus.

| Parent | Dry matter <sup>a</sup> | Equatorial diameter <sup>a</sup> | Fruit weight <sup>a</sup> | Locules <sup>a</sup>  | Lycopene <sup>a</sup> | Marketable yield <sup>a</sup> | Pericarp thickness <sup>a</sup> | Polar diameter <sup>a</sup> | Total yield <sup>a</sup> | TSS <sup>a</sup>      |
|--------|-------------------------|----------------------------------|---------------------------|-----------------------|-----------------------|-------------------------------|---------------------------------|-----------------------------|--------------------------|-----------------------|
| P1     | 0.091 <sup>***</sup>    | -0.201 <sup>***</sup>            | -12.458 <sup>***</sup>    | -0.022 <sup>***</sup> | -0.121 <sup>***</sup> | -0.333 <sup>***</sup>         | -0.009 <sup>ns</sup>            | 0.061 <sup>*</sup>          | -0.366 <sup>***</sup>    | 0.152 <sup>***</sup>  |
| P2     | 0.346 <sup>***</sup>    | -0.181 <sup>***</sup>            | 6.773 <sup>***</sup>      | 0.355 <sup>***</sup>  | -0.415 <sup>***</sup> | 0.188 <sup>***</sup>          | 0.003 <sup>ns</sup>             | -0.020 <sup>ns</sup>        | 0.151 <sup>***</sup>     | -0.048 <sup>*</sup>   |
| P3     | -0.105 <sup>***</sup>   | -0.098 <sup>***</sup>            | -15.122 <sup>***</sup>    | -0.298 <sup>***</sup> | 0.454 <sup>***</sup>  | -0.133 <sup>***</sup>         | -0.007 <sup>ns</sup>            | -0.061 <sup>*</sup>         | -0.206 <sup>***</sup>    | 0.010 <sup>ns</sup>   |
| P4     | -0.121 <sup>***</sup>   | 0.273 <sup>***</sup>             | 8.495 <sup>***</sup>      | 0.261 <sup>***</sup>  | -0.086 <sup>**</sup>  | 0.048 <sup>ns</sup>           | -0.002 <sup>ns</sup>            | 0.025 <sup>ns</sup>         | 0.089 <sup>**</sup>      | -0.168 <sup>***</sup> |
| P5     | -0.067 <sup>**</sup>    | 0.137 <sup>***</sup>             | 9.596 <sup>***</sup>      | -0.085 <sup>**</sup>  | -0.061 <sup>*</sup>   | -0.180 <sup>***</sup>         | -0.016 <sup>*</sup>             | 0.177 <sup>***</sup>        | -0.207 <sup>***</sup>    | 0.034 <sup>ns</sup>   |
| P6     | -0.178 <sup>***</sup>   | 0.041 <sup>ns</sup>              | -0.690 <sup>ns</sup>      | -0.273 <sup>***</sup> | 0.427 <sup>***</sup>  | 0.161 <sup>***</sup>          | -0.038 <sup>***</sup>           | -0.257 <sup>***</sup>       | 0.154 <sup>***</sup>     | -0.071 <sup>**</sup>  |
| P7     | 0.021 <sup>ns</sup>     | 0.195 <sup>***</sup>             | 7.770 <sup>***</sup>      | -0.089 <sup>**</sup>  | 0.106 <sup>***</sup>  | 0.012 <sup>ns</sup>           | 0.018 <sup>*</sup>              | 0.263 <sup>***</sup>        | 0.032 <sup>ns</sup>      | 0.023 <sup>ns</sup>   |
| P8     | 0.170 <sup>***</sup>    | 0.168 <sup>***</sup>             | 8.453 <sup>***</sup>      | 0.350 <sup>***</sup>  | -0.169 <sup>***</sup> | 0.018 <sup>ns</sup>           | 0.115 <sup>***</sup>            | -0.039 <sup>ns</sup>        | 0.023 <sup>ns</sup>      | 0.195 <sup>***</sup>  |
| P9     | 0.033 <sup>ns</sup>     | -0.045 <sup>ns</sup>             | 4.867 <sup>***</sup>      | 0.126 <sup>***</sup>  | 0.213 <sup>***</sup>  | -0.070 <sup>**</sup>          | 0.029 <sup>***</sup>            | -0.178 <sup>***</sup>       | -0.050 <sup>*</sup>      | -0.011 <sup>ns</sup>  |
| P10    | -0.185 <sup>***</sup>   | 0.007 <sup>ns</sup>              | -0.081 <sup>ns</sup>      | -0.120 <sup>***</sup> | -0.215 <sup>***</sup> | 0.141 <sup>***</sup>          | -0.035 <sup>***</sup>           | 0.060 <sup>*</sup>          | 0.215 <sup>***</sup>     | -0.098 <sup>***</sup> |
| P11    | -0.003 <sup>ns</sup>    | -0.296 <sup>***</sup>            | -17.605 <sup>***</sup>    | -0.205 <sup>***</sup> | -0.132 <sup>***</sup> | 0.148 <sup>***</sup>          | -0.058 <sup>***</sup>           | -0.032 <sup>ns</sup>        | 0.164 <sup>***</sup>     | -0.019 <sup>ns</sup>  |

258 <sup>a\*\*\*</sup>, <sup>\*\*</sup>, <sup>\*</sup> indicate significant at p<0.001, p<0.01, or p<0.05, respectively.

259 The results of specific combining ability estimates are given in Table S1. The crosses  
260 with the highest SCA effects for Dry matter content are H22 (1.343), H9 (0.986) and H17  
261 (0.903). The highest SCA effects of 1.386, 1.179 and 1.097 were recorded in the crosses  
262 H46, H35 and H23 respectively for the equatorial diameter. For fruit weight, the highest  
263 positive SCA effects were observed in crosses H17 (26.728), H35(26.639) and H16  
264 (23.633). For locule number crosses H34, H43 and H46 have the highest SCA effects of  
265 1.551, 1.289 and 1.217 respectively. Similarly, the highest SCA estimates for the lycopene  
266 content were recorded in the crosses H30 (1.724), H24 (1.617) and H14 (1.460) in that  
267 order. For marketable yield crosses H49 (1.649), H23 (1.134) and H32 (0.918) recorded  
268 the highest SCA values. Likewise, for pericarp thickness H29 (0.218), H42 (0.166) and  
269 H25 (0.140) were significant. Crosses H3 (1.589), H34 (1.283) and H35 (1.005) possessed  
270 the highest SCA values for the polar diameter. In case of total yield H49, H23 and H42  
271 with values of 1.539, 1.157 and 0.917 recorded the highest SCA effects respectively. For  
272 the TSS content crosses with highest SCA effects included H49 (1.017), H26 (0.961) and  
273 H28 (0.928). Hybrid combinations, H23, H35, H42, H46 and H49 were found to be good  
274 specific combiners for more than one trait (Figure 5). However, none of the hybrids  
275 exhibited significant SCA effects for all the traits. The information about the SCA and  
276 GCA is crucial for maximizing the genetic gain. In case of self-pollinated crops, SCA  
277 effects generally do not contribute to the improvement of the trait. These results agree with  
278 the results reported in the previous studies under stress and under natural conditions  
279 [22,58–60].

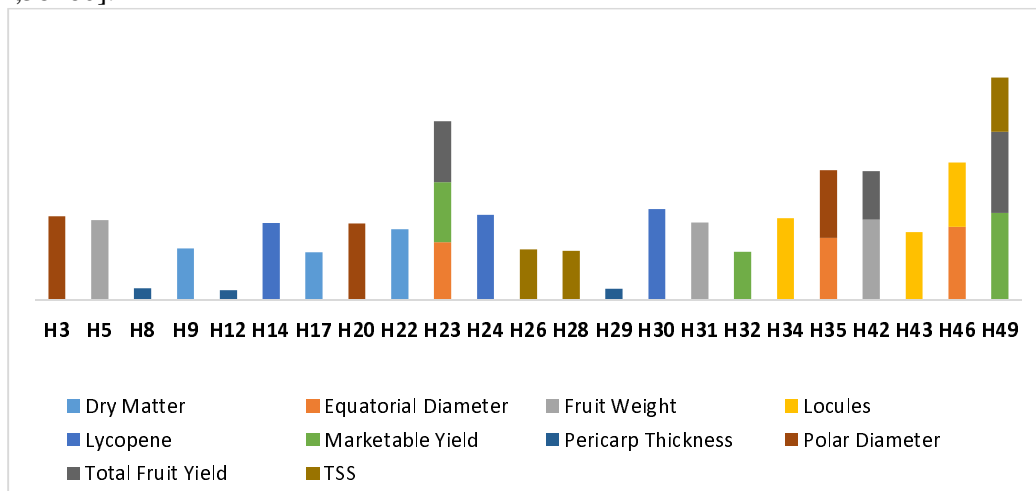

280

281 **Figure 5.** Promising hybrid cross combinations identified based on SCA values,  
282 under leaf curl virus infestation.

### 283 Correlations

284 A total of 14 correlations were found to be significant ( $P < 0.05$ ) (Figure 6). One of the  
285 correlation was absolute (0.966) that is between total yield and marketable yield. Locule  
286 number is found to be correlated with fruit weight (0.43), equatorial diameter (0.32), dry  
287 matter (0.31) and TSS (0.17). While the fruit weight was correlated with equatorial  
288 diameter (0.54), locules (0.43), pericarp thickness (0.28) and polar diameter  
289 (0.27). Previous research works conducted on tomato showed the similar results. In this  
290 direction, a high correlation was noticed between fruit yield, fruit weight and pericarp  
291 thickness [61,62]. Although it is worth mentioning that no correlation was found between  
292 yield and any of the morphological and biochemical traits. Tomato plant yield under  
293 TLCV pressure is independent of any morphological and biochemical trait. Likewise,

294 earlier it was shown that under salt stress, plants survival and yield are independent of each  
 295 other[63].

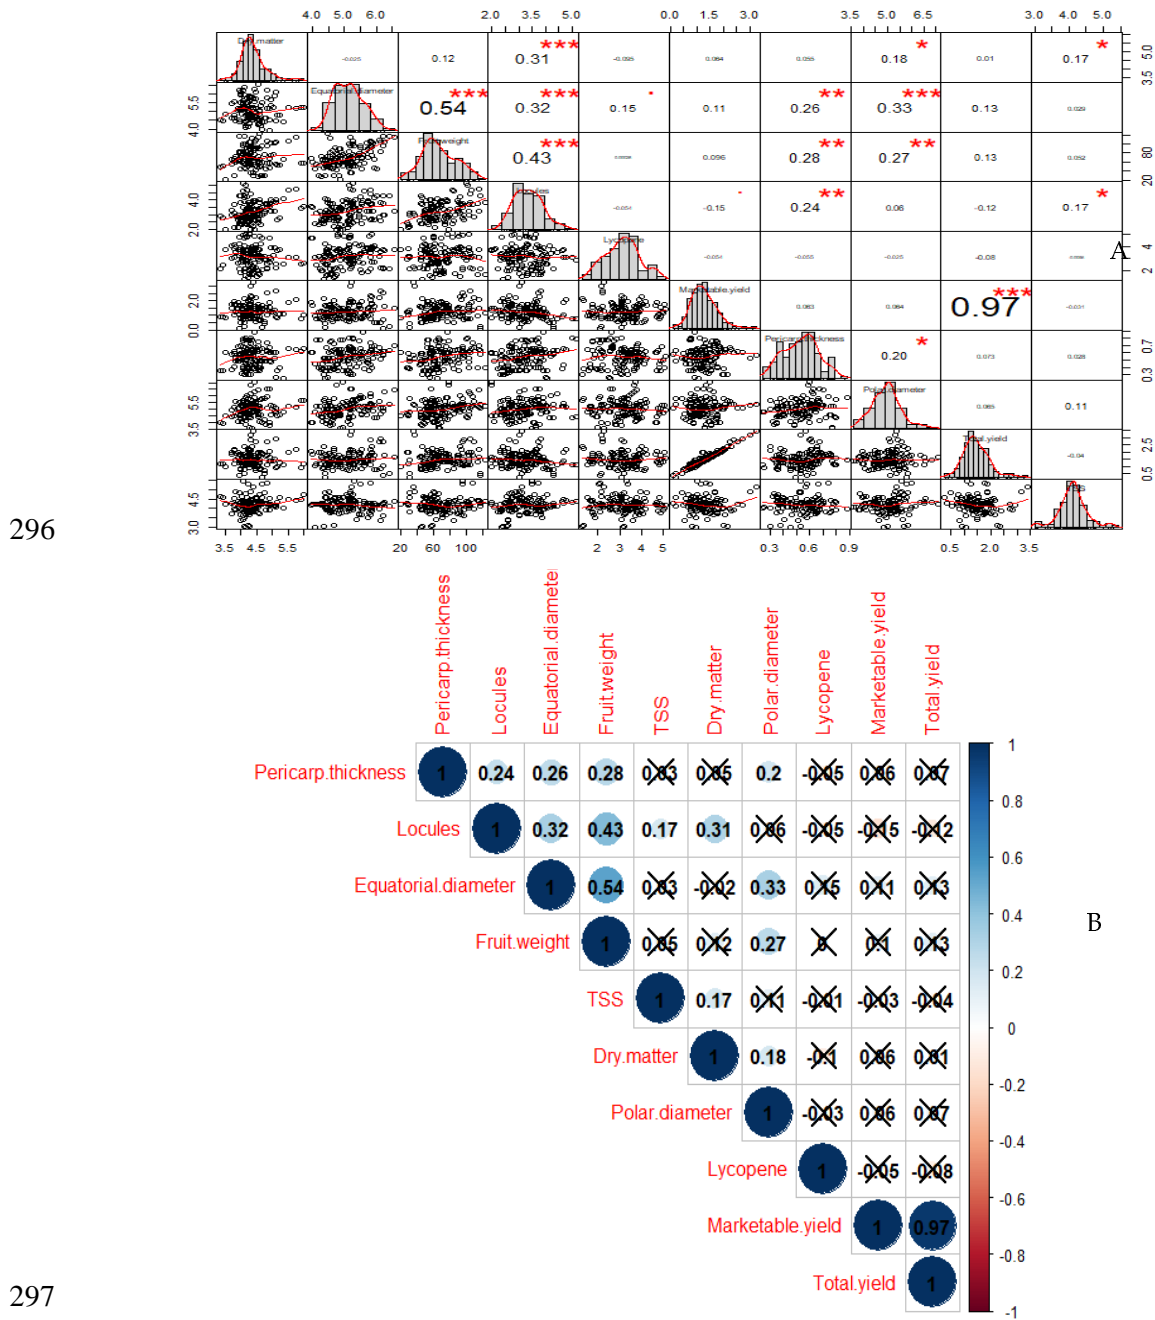

297

298 **Figure 6.** Pearson's correlation coefficients with significant values at  $p < 0.001$   
 299 (\*\*\*) ,  $p < 0.01$  (\*\*), or  $p < 0.05$  (\*), respectively (upper diagonal) along with the  
 300 pattern of the distribution of data via scatter plots and histograms (lower diagonal)  
 301 (A). While all the significant Pearson's correlation coefficients at  $p < 0.05$  (B).

#### 302 4. Conclusions

303 During the past decades, breeding for tomato leaf curl virus resistance has been a major  
304 focus for the resistance breeding programs in tomato. Therefore, breeding efforts have been  
305 made to combine significant resistance to TLCV with important fruit quality and yield  
306 traits. The diallel matting design is a popular choice as it helps in the identification of  
307 parents with good GCA effects and hybrids with good SCA effects.

308 Additionally, it provides the important information on gene action and inheritance of  
309 the traits. In this study, we evaluated seven morphological and three biochemical traits of  
310 interest for tomato breeding under leaf curl virus pressure. The high diversity in the  
311 material was confirmed by GCA and SCA values for all traits. This showed the significance  
312 of both the additive and the non-additive effects in the inheritance of the traits evaluated.  
313 Also, we have dissected the inheritance of total yield using the Bayesian approach. It was  
314 shown that total yield was more dependent on additive variance than the non-additive  
315 variance. Overall, this information will be useful to design and develop breeding programs  
316 aiming to improve TLCV resistance along with a respectable combination of important  
317 traits. The moderately resistant and high yielding parents (P4 and P9) and hybrids (H23,  
318 H42, and H49) could be used for the resistance breeding in tomato .

319 **Conflicts of Interest:** The author declares no conflict of interest.

#### 320 References

- 321 1. Kalloo, G. *Genetic Improvement of Tomato*; Springer Science & Business Media,  
322 2012; ISBN 978-3-642-84275-7.
- 323 2. Viquez-Zamora, M.; Vosman, B.; van de Geest, H.; Bovy, A.; Visser, R. G.; Finkers,  
324 R.; van Heusden, A. W. Tomato breeding in the genomics era: insights from a SNP  
325 array. *BMC Genomics***2013**, *14*, 354, doi:10.1186/1471-2164-14-354.
- 326 3. Hossain, M. A.; Wani, S. H.; Bhattacharjee, S.; Burritt, D. J.; Tran, L.-S. P. *Drought*  
327 *Stress Tolerance in Plants, Vol 1: Physiology and Biochemistry*; Springer, 2016; ISBN  
328 978-3-319-28899-4.
- 329 4. Jacobsen, S.-E.; Jensen, C. R.; Liu, F. Improving crop production in the arid  
330 Mediterranean climate. *Field Crops Research***2012**, *128*, 34–47,  
331 doi:10.1016/j.fcr.2011.12.001.
- 332 5. Jensen, C. R.; Battilani, A.; Plauborg, F.; Psarras, G.; Chartzoulakis, K.; Janowiak, F.;  
333 Stikic, R.; Jovanovic, Z.; Li, G.; Qi, X.; Liu, F.; Jacobsen, S.-E.; Andersen, M. N.  
334 Deficit irrigation based on drought tolerance and root signalling in potatoes and  
335 tomatoes. *Agricultural Water Management***2010**, *98*, 403–413,  
336 doi:10.1016/j.agwat.2010.10.018.
- 337 6. S.Kumar, G.; T.S, T. *Disease Problems In Vegetable Production*; Scientific  
338 Publishers, 2012; ISBN 978-93-86347-51-0.
- 339 7. Xu, C.; Sun, X.; Taylor, A.; Jiao, C.; Xu, Y.; Cai, X.; Wang, X.; Ge, C.; Pan, G.;  
340 Wang, Q.; Fei, Z.; Wang, Q. Diversity, Distribution, and Evolution of Tomato Viruses  
341 in China Uncovered by Small RNA Sequencing. *J Virol***2017**, *91*, 1-14,  
342 doi:10.1128/JVI.00173-17.
- 343 8. Picó, B.; Díez, M. J.; Nuez, F. Viral diseases causing the greatest economic losses to  
344 the tomato crop. II. The Tomato yellow leaf curl virus — a review. *Scientia*  
345 *Horticulturae***1996**, *67*, 151–196, doi:10.1016/S0304-4238(96)00945-4.
- 346 9. Saxena, S.; Tiwari, A. K. *Begomoviruses: Occurrence and Management in Asia and*  
347 *Africa*; Springer, 2017; ISBN 978-981-10-5984-1.
- 348 10. Gaikwad, K. A.; Cheema, D. S.; Sharma, A.; Dhaliwal, M. S.  
349 REACTIOOFELITETOMATO (*SOLANUMLYCOPERSICUM* L.) GERMPLASM

- 350 AGAINST TOMATO LEAF CURL VIRUS DISEASE. *Acta Horticulturae***2011**,  
351 157–161, doi:10.17660/ActaHortic.2011.914.28.
- 352 11. Moriones, E.; Praveen, S.; Chakraborty, S. Tomato Leaf Curl New Delhi Virus: An  
353 Emerging Virus Complex Threatening Vegetable and Fiber Crops. *Viruses***2017**, *9*,  
354 264, doi:10.3390/v9100264.
- 355 12. Sharma, N.; Prasad, M. An insight into plant–Tomato leaf curl New Delhi virus  
356 interaction. *Nucleus***2017**, *60*, 335–348, doi:10.1007/s13237-017-0224-5.
- 357 13. Picó, B.; Díez, M. J.; Nuez, F. Evaluation of whitefly-mediated inoculation techniques  
358 to screen *Lycopersicon esculentum* and wild relatives for resistance to Tomato yellow  
359 leaf curl virus. *Euphytica***1998**, *101*, 259–271, doi:10.1023/A:1018353806051.
- 360 14. Singh, R. K.; Rai, N.; Singh, M.; Saha, S.; Singh, S. N. Detection of tomato leaf curl  
361 virus resistance and inheritance in tomato (*Solanum lycopersicum* L.). *The Journal of*  
362 *Agricultural Science***2015**, *153*, 78–89, doi:10.1017/S0021859613000932.
- 363 15. Díez, M. J.; Nuez, F. Tomato. In *Vegetables II*; Handbook of Plant Breeding;  
364 Springer, New York, NY, 2008; pp. 249–323 ISBN 978-0-387-74108-6.
- 365 16. Kaushik, P.; Andújar, I.; Vilanova, S.; Plazas, M.; Gramazio, P.; Herraiz, F. J.; Brar,  
366 N. S.; Prohens, J. Breeding Vegetables with Increased Content in Bioactive Phenolic  
367 Acids. *Molecules***2015**, *20*, 18464–18481, doi:10.3390/molecules201018464.
- 368 17. Arias, R.; Lee, T.-C.; Logendra, L.; Janes, H. Correlation of Lycopene Measured by  
369 HPLC with the L\*, a\*, b\* Color Readings of a Hydroponic Tomato and the  
370 Relationship of Maturity with Color and Lycopene Content. *J. Agric. Food*  
371 *Chem.***2000**, *48*, 1697–1702, doi:10.1021/jf990974e.
- 372 18. Palozza, P.; Simone, R. E.; Catalano, A.; Mele, M. C. Tomato Lycopene and Lung  
373 Cancer Prevention: From Experimental to Human Studies. *Cancers (Basel)***2011**, *3*,  
374 2333–2357, doi:10.3390/cancers3022333.
- 375 19. Wei, M. Y.; Giovannucci, E. L. Lycopene, Tomato Products, and Prostate Cancer  
376 Incidence: A Review and Reassessment in the PSA Screening Era. *J. Onco***2012**,  
377 p.271063, Available online: <https://www.hindawi.com/journals/jo/2012/271063/>.
- 378 20. Des Marais, D. L.; Hernandez, K. M.; Juenger, T. E. Genotype-by-Environment  
379 Interaction and Plasticity: Exploring Genomic Responses of Plants to the Abiotic  
380 Environment. *Annual Review of Ecology, Evolution, and Systematics***2013**, *44*, 5–29,  
381 doi:10.1146/annurev-ecolsys-110512-135806.
- 382 21. Beckles, D. M. Factors affecting the postharvest soluble solids and sugar content of  
383 tomato (*Solanum lycopersicum* L.) fruit. *Postharvest Biology and Technology***2012**, *63*,  
384 129–140, doi:10.1016/j.postharvbio.2011.05.016.
- 385 22. Acharya, B.; Dutta, S.; Dutta, S.; Chattopadhyay, A. Breeding tomato for  
386 simultaneous improvement of processing quality, fruit yield, and dual disease  
387 tolerance. *International Journal of Vegetable Science***2018**, *0*, 1–17,  
388 doi:10.1080/19315260.2018.1427648.
- 389 23. Panthee, D. R.; Perkins-Veazie, P.; Anderson, C.; Ibrahim, R. Diallel Analysis for  
390 Lycopene Content in the Hybrids Derived from Different Colored Parents in Tomato.  
391 *American Journal of Plant Sciences***2015**, *06*, 1483, doi:10.4236/ajps.2015.69147.
- 392 24. Shattuck, v. I.; Christie, B.; Corso, C. Principles for Griffing’s combining ability  
393 analysis. *Genetica***1993**, *90*, 73–77, doi:10.1007/BF01435180.
- 394 25. Griffing, B. Concept of General and Specific Combining Ability in Relation to Diallel  
395 Crossing Systems. *Aust. Jnl. Of Bio. Sci.***1956**, *9*, 463–493, doi:10.1071/bi9560463.
- 396 26. Hanson, P. M.; Licardo, O.; Hanudin; Wang, J.-F.; Chen, J. Diallel Analysis of  
397 Bacterial Wilt Resistance in Tomato Derived from Different Sources. *Plant*  
398 *Disease***1998**, *82*, 74–78, doi:10.1094/PDIS.1998.82.1.74.
- 399 27. Kaushik, P.; Plazas, M.; Prohens, J.; Vilanova, S.; Gramazio, P. Diallel genetic  
400 analysis for multiple traits in eggplant and assessment of genetic distances for

- 401 predicting hybrids performance. *PLOS ONE* **2018**, *13*, e0199943,  
402 doi:10.1371/journal.pone.0199943.
- 403 28. Rêgo, E. R. do; Rêgo, M. M. do; Finger, F. L.; Cruz, C. D.; Casali, V. W. D. A diallel  
404 study of yield components and fruit quality in chilli pepper (*Capsicum baccatum*).  
405 *Euphytica* **2009**, *168*, 275–287, doi:10.1007/s10681-009-9947-y.
- 406 29. Taggar, G. K.; Gill, R. S. Preference of whitefly, <Emphasis  
407 Type="Italic">Bemisia tabaci, </Emphasis> towards black gram genotypes: Role of  
408 morphological leaf characteristics. *Phytoparasitica* **2012**, *40*, 461–474,  
409 doi:10.1007/s12600-012-0247-z.
- 410 30. Toscano, L. C.; Jr, B.; Leal, A.; Maruyama, W. I. Nonpreference of whitefly for  
411 oviposition in tomato genotypes. *Scientia Agricola* **2002**, *59*, 677–681,  
412 doi:10.1590/S0103-90162002000400009.
- 413 31. Wu, H. X.; Matheson, A. C. Analysis of half-diallel mating design with missing  
414 crosses: theory and SAS program for testing and estimating GCA and SCA fixed  
415 effects. *Silvae Genetica* **2000**, *49*, 130–137.
- 416 32. Xiang, B.; Li, B. A new mixed analytical method for genetic analysis of diallel data.  
417 *Can. J. For. Res.* **2001**, *31*, 2252–2259, doi:10.1139/x01-154.
- 418 33. Greenberg, A. J.; Hackett, S. R.; Harshman, L. G.; Clark, A. G. A Hierarchical  
419 Bayesian Model for a Novel Sparse Partial Diallel Crossing Design. *Genetics* **2010**,  
420 *185*, 361–373, doi:10.1534/genetics.110.115055.
- 421 34. Lenarcic, A. B.; Svenson, K. L.; Churchill, G. A.; Valdar, W. A general Bayesian  
422 approach to analyzing diallel crosses of inbred strains. *Genetics* **2012**, *190*, 413–435,  
423 doi:10.1534/genetics.111.132563.
- 424 35. Turner, S. D.; Maurizio, P. L.; Valdar, W.; Yandell, B. S.; Simon, P. W. Dissecting  
425 the Genetic Architecture of Shoot Growth in Carrot (*Daucus carota* L.) Using a Diallel  
426 Mating Design. *G3: Genes, Genomes, Genetics* **2018**, *8*, 411–426,  
427 doi:10.1534/g3.117.300235.
- 428 36. Banerjee, M. K.; Kallou Inheritance of tomato leaf curl virus resistance in  
429 *Lycopersicon hirsutum* f. *glabratum*. *Euphytica* **1987**, *36*, 581–584,  
430 doi:10.1007/BF00041506.
- 431 37. Sharma, O. P.; Mahajan, R.; Singh, S. Field reaction of some root-knot resistant  
432 tomato varieties and hybrids to tobacco mosaic and tobacco leaf curl viruses. *Indian*  
433 *Journal of Mycology and Plant Pathology* **1984**, *14*, 148–150.
- 434 38. Maria Alda, L.; Gogoasă, I.; Bordean, D.-M.; Gergen, I.; Alda, S.; Moldovan, C.;  
435 Niță, L. Lycopene content of tomatoes and tomato products. *J.*  
436 *Agroalimentary Processes Technol.* **2009**, *15*, 540–542.
- 437 39. Rodríguez, F.; Alvarado, G.; Pacheco, Á.; Crossa, J.; Burgueño, J. AGD-R (Analysis  
438 of Genetic Designs with R for Windows) Version 4.0 2017.
- 439 40. Wei, T.; Simko, V.; Levy, M.; Xie, Y.; Jin, Y.; Zemla, J. *corrplot: Visualization of a*  
440 *Correlation Matrix*; 2017;
- 441 41. Peterson, B. G.; Carl, P.; Boudt, K.; Bennett, R.; Ulrich, J.; Zivot, E.; Cornilly, D.;  
442 Hung, E.; Lestel, M.; Balkissoon, K.; Wuertz, D. *PerformanceAnalytics: Econometric*  
443 *Tools for Performance and Risk Analysis*; 2018;
- 444 42. Lapidot, M.; Ben-Joseph, R.; Cohen, L.; Machbash, Z.; Levy, D. Development of a  
445 Scale for Evaluation of Tomato yellow leaf curl virus Resistance Level in Tomato  
446 Plants. *Phytopathology* **2006**, *96*, 1404–1408, doi:10.1094/PHYTO-96-1404.
- 447 43. Ambawat, S.; Sharma, P.; Yadav, N. R.; Yadav, R. C. MYB transcription factor genes  
448 as regulators for plant responses: an overview. *Physiol Mol Biol Plants* **2013**, *19*, 307–  
449 321, doi:10.1007/s12298-013-0179-1.
- 450 44. Gaikwad, K. A.; Sharma, A.; Cheema, D. S.  
451 MOLECULAR DETECTION AND CHARACTERIZATION OF LEAF CURL VIRUS IN

- 452        FECTINGTOMATOINPUNJAB, INDIA. *Acta Horticulturae***2011**, 153–156,  
453        doi:10.17660/ActaHortic.2011.914.27.
- 454        45. Lapidot, M.; Friedmann, M.; Lachman, O.; Yehezkel, A.; Nahon, S.; Cohen, S.;  
455        Pilowsky, M. Comparison of Resistance Level to Tomato Yellow LeafCurlVirus  
456        Among Commercial Cultivars and Breeding Lines. *Plant Disease***1997**, *81*, 1425–  
457        1428, doi:10.1094/PDIS.1997.81.12.1425.
- 458        46. Pérez-De-Castro, A.; Campos, G.; Julián, O.; Dueñas, F.; Álvarez, M.; Martínez-  
459        Zubiaur, Y.; Díez, M. J. Evaluation under diverse conditions of a differential host  
460        reaction scale to Tomato yellow leaf curl virus in tomato.  
461        *PhytopathologiaMediterranea***2017**, *56*, 50–61, doi:10.14601/Phytopathol\_Mediterr-  
462        18356.
- 463        47. Fereres, A.; Peñafior, M. F. G. V.; Favaro, C. F.; Azevedo, K. E. X.; Landi, C. H.;  
464        Maluta, N. K. P.; Bento, J. M. S.; Lopes, J. R. S. Tomato Infection by Whitefly-  
465        Transmitted Circulative and Non-Circulative Viruses Induce Contrasting Changes in  
466        Plant Volatiles and Vector Behaviour. *Viruses***2016**, *8*, 225, doi:10.3390/v8080225.
- 467        48. Channarayappa, C.; Shivashankar, G.; Muniyappa, v.; Frist, R. H. Resistance of  
468        Lycopersicon species to Bemisiatabaci, a tomato leaf curl virus vector. *Can. J.*  
469        *Bot.***1992**, *70*, 2184–2192, doi:10.1139/b92-270.
- 470        49. Farzane, A.; Nemati, H.; Aroiee, H.; Mirshamsi, A.; Vahdati, N. The Estimate of  
471        Combining Ability and Heterosis for Yield and Yield Components in Tomato  
472        (*Lycopersiconesculentum* Mill.). *J. Biol. Environ. Sci.***2012**, *6*, 129-134.
- 473        50. Shalaby, T. A. Mode of gene action, heterosis and inbreeding depression for yield and  
474        its components in tomato (*Solanumlycopersicum* L.). *Scientia Horticulturae***2013**,  
475        *164*, 540–543, doi:10.1016/j.scienta.2013.10.006.
- 476        51. Shankar, A.; Reddy, R.V.S.K.; Sujatha, M.; Pratap, M. Combining ability and gene  
477        action studies for yield and yield contributing traits in tomato (*Solanumlycopersicum*  
478        L.) *Helix* **2012**, *6*, 431 - 435.
- 479        52. Govindarasu, P.; Muthukrishnan, C. R.; Irulappan, I. Combining-ability for yield and  
480        its components in tomato. *Scientia Horticulturae***1981**, *14*, 125–130,  
481        doi:10.1016/0304-4238(81)90003-0.
- 482        53. Dufera, J. T.; Mohammed, W.; Hussien, S.; Kumar, V. Genetic Analysis for Fruit  
483        Yield and Quality Attributes in Some Processing and Fresh Market Tomato  
484        Genotypes. *International Journal of Vegetable Science***2018**, *24*, 227–235,  
485        doi:10.1080/19315260.2017.1410873.
- 486        54. Kumar, R.; Srivastava, K.; Singh, N. P.; Vasistha, N. K.; Singh, R. K.; Singh, M. K.  
487        Combining Ability Analysis for Yield and Quality Traits in Tomato  
488        (*Solanumlycopersicum* L.). *Journal of Agricultural Science***2013**, *5*, 213-218,  
489        doi:10.5539/jas.v5n2p213.
- 490        55. Bleeker, P. M.; Diergaarde, P. J.; Ament, K.; Guerra, J.; Weidner, M.; Schütz, S.; de  
491        Both, M. T. J.; Haring, M. A.; Schuurink, R. C. The Role of Specific Tomato Volatiles  
492        in Tomato-Whitefly Interaction. *Plant Physiol***2009**, *151*, 925–935,  
493        doi:10.1104/pp.109.142661.
- 494        56. Maluta, N. K. P.; Fereres, A.; Lopes, J. R. S. Settling preferences of the whitefly  
495        vector Bemisiatabaci on infected plants varies with virus family and transmission  
496        mode. *EntomologiaExperimentalis et Applicata***165**, 138–147, doi:10.1111/eea.12631.
- 497        57. Crowley, J. J.; Kim, Y.; Lenarcic, A. B.; Quackenbush, C. R.; Barrick, C. J.; Adkins,  
498        D. E.; Shaw, G. S.; Miller, D. R.; de Villena, F. P.-M.; Sullivan, P. F.; Valdar, W.  
499        Genetics of adverse reactions to haloperidol in a mouse diallel: a drug-placebo  
500        experiment and Bayesian causal analysis. *Genetics* **2014**, *196*, 321–347,  
501        doi:10.1534/genetics.113.156901.



- 502 58. Lunt, K. A.; Roux, C. Z.; Blokpoel, I.; Booyse, M. Inheritance of flavour in six tomato  
503 (*Lycopersicon esculentum*) varieties. *South African Journal of Plant and Soil* **1999**, *16*,  
504 113–117, doi:10.1080/02571862.1999.10634994.
- 505 59. Pandiarana, N.; Chattopadhyay, A.; Seth, T.; Shende, V. D.; Dutta, S.; Hazra, P.  
506 Heterobeltiosis, potence ratio and genetic control of processing quality and disease  
507 severity traits in tomato. *New Zealand Journal of Crop and Horticultural*  
508 *Science* **2015**, *43*, 282–293, doi:10.1080/01140671.2015.1083039.
- 509 60. Souza, L. M. de; Paterniani, M. E. A.; Melo, P. C. T. de; Melo, A. M. de Diallel cross  
510 among fresh market tomato inbreeding lines. *Horticultura Brasileira* **2012**, *30*, 246–  
511 251, doi:10.1590/S0102-05362012000200011.
- 512 61. Kumar, D.; Kumar, R.; Kumar, S.; Bhardwaj, M. L.; Thakur, M. C.; Kumar, R.;  
513 Thakur, K. S.; Dogra, B. S.; Vikram, A.; Thakur, A.; Kumar, P. Genetic Variability,  
514 Correlation and Path Coefficient Analysis in Tomato. *International Journal of*  
515 *Vegetable Science* **2013**, *19*, 313–323, doi:10.1080/19315260.2012.726701.
- 516 62. Souza, L. M. de; Melo, P. C. T.; Luders, R. R.; Melo, A. M. Correlations between  
517 yield and fruit quality characteristics of fresh market tomatoes. *Horticultura Brasileira*  
518 **2012**, *30*, 627–631, doi:10.1590/S0102-05362012000400011.
- 519 63. Rao, E. S.; Kadirvel, P.; Symonds, R. C.; Ebert, A. W. Relationship between survival  
520 and yield related traits in *Solanum pimpinellifolium* under salt stress. *Euphytica* **2013**,  
521 *190*, 215–228, doi:10.1007/s10681-012-0801-2.
